# Supplementary material for: Genotypic and phenotypic diversity of Lactobacillus rhamnosus clinical isolates, their comparison with strain GG and their recognition by complement system
Source: PLoS One. 2017 May 11;12(5):e0176739. doi: 10.1371/journal.pone.0176739 (PMC5426626; doi:10.1371/journal.pone.0176739)
Supplement: S1 Table — (XLS) [file pone.0176739.s001.xls]

## Sheet: S1T
Orthologs unique for Cluster A (not in Cluster B)	Protein AA sequence	Orthologs unique for Cluster B (not in Cluster A)	Protein AA sequence
Hypothetical protein	MVRKRWTVVGSLLLMAALMGGEVAAPVVAVTATDTPVVSSAAATASQKSSSTTASAASSAANSTDAKVQTSTSQEAADTAKKASSATTASGKTSAINNTQAAATNPVIKSIIGQQQATLAPGITEQKLTYLNQNGVQNKYYSVALDPKNPNTTLLAGMPNDGTKPGMQTVRNQANAAISHGQQVVAAVNADYYNMATGAPLGNVVKNGTEIYSAPDTNEAFFGIKKDGTPMIGTAATYQQRKGDLQQAVGGPSIFVKDGKVNATQVAGSEGNEPCTAVGIKADGTVFFVVIDGRQAPLSTGISVGDFAKLMIERGAVNALFLDGGGSATFVARQPGDTSLTVQNSPSDGNERLVANSWLIVSKATADHKLASATVAPDDQVYTPKSSVKFSAKGVDASG…	Hypothetical protein (FIG00742825)	MPSRFKNIRQVFKKAACVGSIGVSIVLTLAVLDGTQPDIKRLFHLTDTRVYAADDKPKDQQTKPQRPRATITGQDAVYTLGEFFSPEAESRLFKEATEPYGKSVPFKNEKIWTVMPDAVKQTTRSMGLNEPYARFDAILAKTPVGLTFDSKFGVATGQGTAQTQYGDAVIAGASDPKNGRDAMGALVFIDRDADGISKVIATSGKGNDNDLIAPEFGSRFYGSYEYVQMRDHQSINLSYFNINDAVANGDTRKQDFLNQWGLNRVQQARMGDIIKVCNAEGKISFARDSKVYQLKKENFPNIDQAIFFQMTPAGFVPLHVNQLKTRPVDVPQNATDAELDAAFPKTLNLRDNIIAECFAGRPDVSKPGKTKAVVRAIEKLYDGKYAKFDYEVELNVIPA…
Phage tail length tape-measure protein	MIEVAQQINATMSTKIALDLLSASESVKSLTAVVRSSQNAWKAQEAEMKSAGDAVGAAQAKYDGLGKSIEAQQSKIDALKAKQAELKGNTADVAQQFLKYQQQIDGANKQLASMQAQQDRAKQAMDYQKSGLAGLQQEYTAAARANQAYVTRLEAEGNQQEANKAKMEGYKSSIANLNEQLSKQSAELDKIASASGKDSDAWRTQKTRVDETATSLAKAKSSMTGLQAEMDKANPSVFNRVKEAISGTNKQAEKTPGLLHKIVEGGLITNAITSGWQTLKGKIEEATAAGMEYEKQQDQMNAIWLTLTGNAEKGQAMVDMTNKLAVKFGQDTDLVNELNQQFYHVFDNQPKTEALTSAFLTMGDAIGLSSDRIQQVGLDFTHTLSGSIVQLGDFNQLTD…	Hypothetical protein (FIG00750667)	MFVIDLETRFSRLNIKVAVLFFYLRYRPIRCWILLPLLLNELRFKLKQIEELKYQAVFWHYLLSVSLTEERWRQFGKRLSKRSHRRVKANTWLVADVPDFLLNWVTPDSRHVGLDIDDHGHLLPQARTLKAKMGFLAPHSLVVSPRFYRLFVRNTGLEKSARIEANNRLFKTYKGFNRYQIALFLRNAFVLLIMAIITGIVTIYLASGDYDLKLTLLVFSSARLVLFNILPIFVVMLVTYLIFNRVQLAIFVGQALAIIVAMVNYFMLQYRDYPFEFADISLASEASNMGSRYSYIPPVKYFFIIGSLLILTIIVGLFLKPAMIRWNTRIIALVLVMVGSAFMLHRYYLVDDYYTLANNDPWGPDADRYVVNGYMFSFIHSVKNDWLLPPENYDAASAK…
CRISPR-associated protein, SAG0894 family	MTKLNQPYGIGLDIGSNSIGFAVVDANSHLLRLKGETAIGARLFREGQSAADRRGSRTTRRRLSRTRWRLSFLRDFFAPHITKIDPDFFLRQKYSEISPKDKDRFKYEKRLFNDRTDAEFYEDYPSMYHLRLHLMTHTHKADPREIFLAIHHILKSRGHFLTPGAAKDFNTDKVDLEDIFPALTEAYAQVYPDLELTFDLAKADDFKAKLLDEQATPSDTQKALVNLLLSSDGEKEIVKKRKQVLTEFAKAITGLKTKFNLALGTEVDEADASNWQFSMGQLDDKWSNIETSMTDQGTEIFEQIQELYRARLLNGIVPAGMSLSQAKVADYGQHKEDLELFKTYLKKLNDHELAKTIRGLYDRYINGDDAKPFLREDFVKALTKEVTAHPNEVSEQLLN…	Hypothetical protein (FIG00752018)	MQEIRGVKWKRDGLWIVGIIVMALVVLAPQINYHAMAIGDDWEFQWNRFYEAAMQIKNGHFNFFQSIYAFRQSGRVVNAVYGSAFAYLNGFILILVKTWFRAQIISSFLCLLTAGSGMYFLARYCRVKRQLAFGAAVLYMGTPLVMFYVTDTALRGWGAALLPFTTIPLIRMVRNHDRPINPVLFGLAAGSLLAVQNFTALLYVLSAVVFFIPGLYLARDRYRTLLAAGGAVAIAVGLNAATLAALIDLHHESLVMPYRVKDLIGSASQLSLGNMTRLDFGLILSFVVVIQLVFAALSWKNLALYEKIINVDGLLFLWLSSPLFPWNVIGKHFPVIQTIQFPQRFNAVALTMIILGAVLSLQKLGRGNFMQLRLIAAVFISLAGLNLINGYTWVNEKAS…
Hypothetical protein (FIG00742825)	MPSRFRNKRQVIQKIACSGLIGISVVITLAVLGGTQPDIKRFFHSTDTRVYAADDKPKAEDKNTERPKATITGQDSAFTLGEFLKSGYEARFFKQATDPDGTNFPFTDNRIWAIVPDAFKQATRSMGLNEPYPRIDTILARTPVDLTFDSRFGVTTGQGSVQTHYGDAVISGASDPKNGRDAMGALVFIDRDEDGTSKVIATSGKGNDNGPIAPEFGDRFYGSYEYVQMRDHQSINLSYFNINDAVANGKTRKQDFLNQWGLNRVQQARMGDIIKVCNAEGKISFARDSKVYQLKKENFPNIDQAIFFQMTPVGFVPLHVNQLKTRPVDVPQNATDAELDAAYPKALNLNNNITADNFRERPDVSKPGKTKAVVRAIEKLYDGKYAKFDYEVELNVIPA…	Ribose ABC transport system, ATP-binding protein RbsA (TC 3.A.1.2.1)	MKIEMKEITKSFGANQVLKGVNFTIDSGEVHALMGENGAGKSTLMNILTGLYPANSGEILVDGQPTTYSGPMEAEQHGISFIHQEMNNFLEMSVVDNMFLNKELRNRFGLMDSKAMRDQADHYLSLLGAKLDVDQPIGSLSVGRQQMVEIAKSLMTDAKIIIMDEPTAALTETEISQLFTVVRRLKAKGVGFIYISHRMEEIFEIADKVTVMRDGRSITEYATKDVTMKQLVKDMVGREIEDFYPERTPTFGPVAMEVKHLTEKGVFQDVSFSVRQGEILGFSGLMGAGRTEIMRAIFGIDKYQSGEILLDGQPVKIRDPQAAIRHNLGFLTENRKDEGLILDDSLHDNIVLPSIDGFVKHGLVDDKATDDFVRLLMKRLTVKAMGPDVTAGSLSGGNQ…
Hypothetical protein	MISTKEIANYYLQSLRQSSLVEVNAKYTKPFSTNYSEIVEGKILSPTFPDFFKRTRKGLAKTESSNGLSVFIMPIVIKTAKVFIYPFIIPAMLNEDGQLTHQEYTVPWIQRELMTPAGEDSSHPLRYKPIANVNDYFDAINGGALDHLEWSDYIHQAEALFQHLTNLSFATFKSIEKVNNYVLPAEPTGICHIIPGEQNLGFSAQIQGLYQDILASKEQLPLFDSLNPESSVQDEKILSQASMRSHYSNHLAQMSPKHGMTDTQRNALANLDATTNGQTLAVSGPPGTGKTTLIQSVVATQWVQAAFKETMPPICVASSVNNQAVTNIIQSFQAGELNDEEVAAFSLPKKAIYQKMSVKKSTLISHWLPGHNTYGLYLAANRNLTDGTLPYAAISINHN…	Hypothetical protein (FIG00747485)	MKQRVELILEDSDKFINRLARYLLVGVFIFCLLCLFKIHVVEGAAWGTPAFVLGGMGVVITFFLLFKLSTVNLSDWQALSLLAGITIIFLGLWNYVYRTKPVSDYQVLLEGARDIVNGTFKSQAVKPSDYFRYYNFQIGYAYYLSVFMRVFGDRLLYFKIVEMVVITLTVLTLYKTLRLFSNRHVAFFGAGLFAFFPFIFIGAGIINNQHEGLLLEALAIYFVLKRRSWLNLLIAAICIAVAQVLRPTAVVVAMAILVALIIQAIQQKSRQRLGEAVLFLSCFWILGWAINQLFILSGIAPYGIKGGNPYYKFLIGLTGKGVSGKYTTSARKSQLYYDLKAYHFDYALYKDAAAEKLRNAFTHGIDIQEVMKRFTGFIGNVDNQYNLGGNQHFLDRHPL…
Hypothetical protein (FIG00744190)	MKKKIFIITCLAVMISMVLGPLQTVMAETPKWPSPGLNNKVNVYPIPGAGTFTSINGVFDKIEGSNSAPINVNNDTVALELNADKDAQVGAMWSKKPIVDLTNNFTLDLQVYFGNKILNGADGLAFALTGTRPTNAGINGASLGVWGGADGSSAATIAAQGLQNSFVVVVDTHKSENDPDALYPNLLENHQYVGSGYPGKTEMYGIQNNKSKLKFGAALMPPSYVNQIKNNISNDKWHRLSISWQAYPEGGGALTYSFSNTSSTPAQTITQTVKWTETEMDNIFGQKVRQVYLGFTSASGPKVLIDSYMEPHLITIKSLADFNQIKGAVTLQRGTEPVVEDTLLKIGDKLTYRYVIDVANLEGSEWPVNQIILPKGKYFDYLKPDGKPAVAGDKLPVSI…	Putative O-unit flippase	MPNRFEVTRKSIVWSYAGTIFSMASNFLLLPIIFHFLNSQEIGYWYLILSINGLIALFDFGFDPAFARNIAYIWSGAKTLKSRGVDKEHDHTVINYHLLASTIHAARAIYMILAIVAVVLVGIFGTIYMNAFVFSKLPDAEYKWTWLVFCFSLFLNLYFGYFSALLRGSGKIDSVNKAQVFSRSLQILLTFGGFLIYPSILSPVIGLVMYGIIFRTICSHFYWQDEEVRSHRDVLKSPMNWHEIKEIFLFIWPNTWRDGLVSMSNYVTSQGMSLMAGAFLPLSVTGVYSVGVQFASAIGTASSAINGAYNPILQSNFVKQDFASIRDKTSKAVAAYVWLFLIASVGTLLVIFPLLKLIKPASVPTLEVFLPLILYYFLYQQHSVHASYIANANIIPYTK…
Phage tail fibers	MKQAGIKITYAGVDITQWMYVQMVERDVGTNHVNTMQKVGISDGQMLQYMSRDVKTIVVTGIVMNDDLVPLRRSLAAAIDADEPQQLIFGDEPDKYYLAIVDSQPTFTEGFRSGTISISFVCPDGGIAHSVATQTADNTPYKDVPVNMLTDSGFESGKTPSGIVWGTSSDDDRTAEVNPAMPSYPTPFGTYMLRIENQSSDSSIDPDQYIVFPLPTPVTIKAGETWTYSYKYAAAGSATGQASDYLTTNGLSPIWGLSMGHGNRDTDGGQDTWHQFSATMTADSDITVTNYRFGFVKTYAGGGWICIDNIKLEKNDTASPWSPNPADPEYYSDTITVTNSGTVPVPVKVTSKFSSDDGFLGLTLNGRYYQVGNTKEVNGKTYDDSQMLVKTRPTIDKYI…	Flagellar hook-length control protein FliK	MKRKHIFQVLVGTLIAGYLTVFYGMRNTIDTSFTQHAVQAATEQTNQLYTSTKRAFPAKNLSKNAVTSTQSKLEQLAQNVDDRDQKKVVLKDKQDADAASHMLTIEETVKTQNGNLAQTAEDGSRANAAYKAIANTKPEFAADYQQQVNQLYKKSLAIAQIQKLYQDQNMQHPKANLSSDSIDLAVNAVENVENQDFAKNVLPLVQVARNSQESNDSNVAMGQNSASSQSKQTDQQTSASGAEPASGVGTTAAASSQKTSSSSSSSQQPAESSQPSSSNPTGSSTSSSIDQGQSSSTPASTGSIEPLTTVLSGGLYKTYDDAVAAIKVQGKSVDDMTVKSVTMSDGSYQWTWGPNGDSSSQASSSSTSSSGSSESSSTGASSSSSRAASSPSSNANQAS…
Protein phage-related	MYDFRETTPFTGSDDNQRPAEAMLIDGQYIEDLIPGYSTLQVSGRELLSQSIEKQTIGKSDGEFIQYVRNPSREIIVGYRLSAADNLSFRQAFYKLNDILHGDTHQVSFNDDLSVYWNAVLTDVDDVPKGRNAITSSFTLFVPDGIAHSVATQTFDNMPYKDIPLNLMAGTSADPVSVTGSGWNIQKLGSFNNPTVGKKYAATVLLGRADFAVSFQLWANDINGNRISLAGFPVTTQMGANQRSTIVCTWPDPGTTGAAQIEVTLAWAFQKTDVGTYQYLKAKLEEGTTYSTWSPNPADPEYYSDTITVHNGGTYPVEPVITATMHADNGVVAFVNDQGSVLQFGSPSEIDGVVRQKSERVYYFDFENEPNGIVMNDGALTYPNYRDNPATPNKQKGIF…	UDP-N-acetylglucosamine 2-epimerase (EC 5.1.3.14)	MAKIKVMTVFGTRPEAIKMAPVVLGLKQRSDEFEEVTVVTGQHREMLDQVLSIFHIQPSYDLNIMKSRQTLADITSNVLLKLGQIIAKEKPDIVLVHGDTTTTFAASVSAFYQQTKVGHVEAGLRTWEKYSPYPEEMNRQLTDVLSDLYFAPTEQSRTNLLKEHHPEKQIFVTGNTAIDALDQTVRDDYHHQVLELIDPDKKMILVTMHRRENQGEPMRRVFKVMREVVETHPDIEIIYPVHLNPVVQEAADSILGHHPRIHLIAPLDVVDFHNLAARSYFIMTDSGGVQEEAPSLGKPVLVLRGTTERPEGVQAGTLKLVGTDPKTVKTAMLQLLDDDQEYQRMSEAKNPYGDGHASQRILDAILYEFGKKATRPVAFK
Hypothetical protein (FIG01282627)	MKNEDIRTFDVKIRAETGLANENSNNQAENGQNMDISGVAAVFNQPSIKGDFTEYVDQNALNNVDLSQVLLLYAHDFSNILARVDVGTLQTSIQPDGLHFNAQLPDTQLGHDTYTNILNGNIRGMSFGFKIAPGGDSWSVNSQGNTIHTINKIDQVFELSLTPIPAYTETSVQVQRDLAQFLSSKKEVVKMAEKPEEKEEQSVDDQKRSIEQLQQQLSDLKAQVKTKVVIDKPEEEKRDATPDMASDETTAQQTSGDLVSMIATLQAAIQSLSQQLADQQAPSQMDDDVPDDDNNVVLDEAKPKQETAKTEKHDGNPDEVTTAQDVEQENKRDGAKKMAKNLTADKVEDEEVRDFKEFLKTGEIKRDSTGFDSNAGEAVLPSQVLDIMSQPKDPAQLGG…	Glycosyl transferase, group 1	MKILFVSTGHVDDDSRLLKESAALQAAGHDVTILGWREEPHGRMTTDTFEFDGQKLKAIFTGIKLSYSFKYFKVLAFIRFEAFLYRWLRKHLHEYDAVQACNVHTGYVTAKVVKKTKTKFVYDIFDYAPDTRNYPEWYRKMVVHWENVTMATADWTLICSEDRRRQIEPAKPKNLAVIYNSPLDSSVAADAEVINPKQTSFRIVYIGGLSPYRCLPELLGAVENNPALSLTVAGQGQFQNMFADAAKRDQRIDYLGVVPYEKVNGIEKTADILVALYDPVLKNHLYASPNKFFEAMELGKPLLMIKRSGMSNWLTKYGFGAVCEPSESGIAAGLQELVDKRQDWAKEAVLMRQIYQKEFAWPLMQQRLRRIYASFETK
Phage terminase large subunit	MVDYDLTLPDWTVERAYKQQRDNGAYDKIADKYHDPMTAYAFQVLEGTTMAGQDIKLACWRHLQDLTRISSDDFPYTYDLGKCHEVLNFASICPDVDTGKPLPLMLWQKALLCSSQGWRNEKGERRFHRVQFSVARTNGKTYITNILLAYDYLIASDGMYNQDMGYIAPVVAQSKKGWRYIQLTFDRLGELTDVKRTYKTQQIKTLDDVVRSKKTRNQLLRLSHESGQFDSYHFRLAVADESGDDGRIGTIKENIGKITSGQVQVYDHQFWSISTAYPDSTSSFYLDEKLAREAMQKDYSRDLDDVLLINYSQDSEDEVDDPSSWTKSNPILELKKDTMLPSLVSERDKKKLDGTLDEFKNKNLNMWIKASDNRYLNIHDIENAVADKPPFSISGHDVY…	Transcriptional regulator, XRE family	MEINVGAVISAFRKQKGVTQEALADFVGVSKASVSKWETGQSYPDITLLPILAAYFDVSIDQLMAYDAQLQPSEIRRIYTSLKQAFETQPPARVLTSIRNLIRRYYSCYPFLLQMGLLLLNNYDLLPGESQTAKMKTYVTEAQQLFVRVHQNSGDLRLTAKAVELEGYSLLLLKRPDEVLALLGEYVPEQLPADSLIAGAFQQKGDLKRAIATSQSGLMQDLSIMMSQLTNYMTLLGDDPQRLKKTYQRGQAIAAAFDLVHLNTAVWANFQLAALTSFAQQVQADNAEAVLRRFVRALMTGELTWTLHGDAYFDAIDPWLNQLDLGPQMPRATSHAKQQVITFILESPTLAALRQRPGIRPLLRELEQLKTQK
Hypothetical protein	MYPDLLTDAFVVAACNGSITQIRQLPKNLNIISEMLLRKYQNVEYLQDLLQNKLLMGDSYKGMAPWISHYNYLVGQFSEEDALSLIKSSQSYPVDAEKLSVEASSLRLVGDYLSDKSFNDTWTILYKKIKVWATRKVSIRQSPTDILGLLRNSFRIPQNDIIAILEALVPSLKHYYEELADIIFGAIDYTAAQIDQQHRVIAVLFTIVKNSDQTRFTGKIRLAILSVLSAWPNESRELKKFLIKNHETFFNHEIAPFIWNNQEDAGYNDFLEDQLSEMKSQNDKQDGKLTFGFATDPFATLNISIKKHAGLNPQMTGQVFEQIVDTLNNPHQVISTKQSATELLMTLLSQSNDSYKDFEKTSDKIRTSKITAEPSGFFEISTPTSLIDAIRSFVDISVL…	Capsular polysaccharide biosynthesis protein	MAFYLGLFAIMIIFMLLGRVTMSSVWAWLGVFMLAVVAGLRYETGNDFLPYKTIYAGDYSAGQVEPGFLFLRNVFNLVHAPFWLFLLAWATVTLVLFYCFAKEYFRPAIIPIAYYMSRFFFMRDMGQIRASLVCVICMLALKFVYDEKPLPFVLVVGLSATIHVSALFFLLIYLFWLLFRKITFKWVLGFLVLGAAGGFIAPKILSVIIVHTLPRYAPYVTNANYLSAGLFDPVTLMQVLICITGFYILQRGIVADALIGGKDKFKFLMLVYLFATLTLLSLSQLSTIGGRLSTIATTTETVVLPTIVFSIMPKKTRTLAMVGVCGVIFVLIFLISGAYKTFIPYQMAF
Regulator of polyketide synthase expression	MKLTTLLHRLNQTMPTGSVPANINPDIINMQLGALRTNQVPAMTFEVKVEANQPLQLIMPSSRTTPATSIQLPHSSPKELPLLFERIGCLLTTKTDLQEQTNHLALKAITDDFDTVLKQSARILGNPLAVVDLVGHPVVTTLKVEDHQSFQQYLQLDNGLTASKSAPPDHFTIPKRPQISLSASQLPLLYLPPSYHNDALGYLVMPTMQTPLNARQYTQFAAVAPIITRSLVKNRIIPTAASKRDHLLTMLLTEQQTETFAAQFARQKAILPSSMALIKAEPCTNQSLAALRERLKYFSTPFFAQTLVTIYHHQCLALVSLDLPEYNSQSFKEHLATIAARTDCRLIVSNQYDRPEDTIAAYAVCKRTAKLKLPRNPVIFCEDAFFDLMLAQVDHVEIL…	Unchracterized conserved protein, similar to IcaC of Staphylococcus; YHJR B.subtilis family	MDLILLPFIGFIFASMRPSQNLQDGHLGKNATNNLKGISIIFIILHHINQEIGEVGGTFFSSRLTLAGRLGVAIFFFVSGYGVMRQYQIKGSTYLKNFLSHRVLPIVVLYLLAMAIIFPIKHQFMGLTLAQAVISMTDGAPFVNDSWFVLAIIFFYVVVWISLRISHGHPLPLFSCLFLLTGVYMVYIGTEGMGEWLINAALVFPVGVLFAFYEQRLVPFIRRYYLPLTLITLTIFALFFTLDEMHGQMRYRVVSEVFFALSVMMISYRVEFVSKIFLISSAWSLNLYLYHPFIADWLYSIDAIGSHSVVYTIVVISLSYLAAGIIALLQLCLQRLKSRRLSVKTV
Protein, PST	MTVVKNFLWNMGYQVFVLLLPIITIPYVSRVLGPTGIGINAYTNSVVQYFILFGTLGITVYGNREVAYERDDPQKLSNVFWELTFLKFLTTGVAVIAYLTFIFLSKQYRVFYLIQGSLLLASAIDVSWFFQGLEEFRITVVRNTFVKIISLVLIFTLVRTKNDLWIYVLILGGSQLIGNLTLIPYLTRYVKWPVLRKMRLGRHLKPTIGMFIPQIASQIYLQVNKTMLGAYIGVEAAGYYDNSDKIIKILLAIVTATGTVLLPHVAHSFARGDRKAVFSSLSKSMHFILLLAFPMSAGLASISPVFTNVFFGIKFSAVAVLLAIESLVIILVGISNAIGIQYLLPTNQTRPFTVSVALGAIVNIFLNIPMILLWGTVGAMTATVISEAAVTAYQLVYVR…	Glycosyltransferase	MALPVLWIVIPCYNEEKVLPITAPRFLKKLTEFIQKKRIAQNSRVLFVDDGSKDRTWSLIQEFSQADDHFLGIQQSRNRGHQNAVLAGLMTAKDHCDVTISIDADGQDDLNAMNDMLTAYEDGCEVVYGVRSDRKSDSWFKRVSAQSFYRFLRLMGVDVVYNHADYRLASSKVLQHLADFKEVNLFLRGMFPLVGFKSTSVYYQRHERLAGKSHYSLSKMVALAINGVTSLSIKPIVFIAELGGIVSLFGFVGTIWAVLMAFRGATVAGWASIVCIVSFMGGIQLLSLGVIGEYVGKTYLESKHRPRFIISQQTWQSEERHTKDESEKLK
Glucosyltransferase (side chain biosynthesis) (EC 2.4.1.-)	MIKKIWSKVSRDSRYSALGIAFLVLLVEHIFMREYVGDAIAVFSHLIDHSSLLSVLYWRYSSWTSRVLIEAPLIRLSSGMHTTTWAVIDTLMWMLLIWSLMALTHYKHNYLVISLVFIYPIIQMQSAGWMATTINYLWPLAMGSYAMVLLDRIYNQKKVGVVPALLALFALAFATNFETFGIMYLCLLTYFSLAMCYFRRFTILGFIFTVLQYAISIANIVFALYSPGNKLRLVTETKDNMLDFSGLTVVDKFVIGVNHAFSEMTDNSFLFLCFAFMIFLVAVTSQRRSKVLVATGIVPLAFVLTRTILKPIVIIYSPKFDQLFNDVADQARVGATNYFNFTSYVPFVLYSLIFAAVLIVLLNAFEKLSTGLFLDVVLISGLLTAVAVGFSPTVYASGP…	Ribose ABC transport system, permease protein RbsC (TC 3.A.1.2.1)	MQAQSKTKAASKVDVKKIFSRLGPLLALVVLIILVTVMSPTFVSPANLLNLLRQVSINAVIAFGMTFVILTGGIDLSVGSILALSGAVTASMLTSGFAAPLALTVGLILGAVFGLLNGVLIAYGKAAPFIATLATMTIFRGATYVFTNGNPITGAKMNNSFLFQFMGRGYLFGIPFPIIIMIVVYGVLFVLLHKTAFGRKTYALGGNETAARIAGVRTKVVTMLIYTISGLMAAIAGIILTSRLSSAQPDAGTSYEMDAIAAVVLGGTSLAGGKGRIFGTLIGALIIGTLNNGMNLLGISSFYQQIVKGIVILIAVLLDRRSGNNG
Hypothetical protein (FIG00746435)	MIRRIGAKIRDNSQLQCLSIAFFVVTLQHLFIREYTGDAATAFSHYLDRTTLLATLHWRYTTWTSRIFIESVLLKLSQNMHIKVWIIIDILMWMLLLWSLMKLTRGRHNYLIMSLVLMIPLSLMNGAGWMATSINYFWPAALGTFALVSLYKIYYHEKANIVTGLVTLLGLAFATNFETYGVMYLCILSFFAVAMILKRRVSTLGVLFTASQYLICIANVGLALIAPGNKARVLVETKFRMLDFANLGPFDKLVMGYTHTFSELTDKNFFFFLFTIMLVVIALFLKSKSRRILVAAFIPFSFVLARTIIAPIAKVYLPEFSALFKDAAEQQRIDALNYFNVMYYIPFLLYVVLLISILLVLCNAFKNFNFGIFLTVVFVSGLLTTVAVGFSPSMYVSGP…	Peptidoglycan N-acetylglucosamine deacetylase (EC 3.5.1.-)	MKHKYLLLGWGLALIAVLAVIICFSLKLYVDHQTNVAKSLSASRHYASVRISESKRSMFSKQAASRRQQEAARRQSSEQVQSNSGRTHIPAADPYAYPIAQVKQEMTAPNTSSIKEKVVFLTFDDGPNTIISPQVLDILNRESVHGTFFVVGRQLSPETTPVLKAEYDAGHAIGLHSMTHNYNLLYPNRVGATSAIENEAKTEQTAVKQALGPDFNTHLWRYPGGHFSWKGLTGADTGLVRLGLDWIDWNAAVGDALGPAQAPKTEEAMLQYHLRSLMVYPDSHVRVVLMHDAVGKDLTVKTLPKIIAYYRSNGYKFGILE
Hypothetical protein	METNNLEDSFQPFLVKTYLFIYFWLVIIFGFTAESMISPVDQPSAYPSFVSFGNKTAYFLASLLLVLGFLKRRSLLNWLITGPLFLVIVYGYLFVNQQVAVVAFIFLVWSSQTVSFRSLVRIDLFARIIVTISLFVVNNLQLLPVSPIIQLGVYSRFSFGFHHPNALGMYLMMISLEMFYLYARKSVKPIVLLILSGILIFVLTRSRGSLISVMSFVVLVTVFNTFKSISFRKLLYSFCILVPLICFLGSLTISIFLPSSSKVFQTLNEWMSGRPELLKLVYDYYAQKSFFGGDIAELANAFYSWSINVRYLYVDNQYMYSVMIFGWFGAVLEVLYSTYCGIRAKIFGDSYLLFWLTAIALFGLVETKLVTLDMALPFMCLGSLTEGVTKDKKVLSAEQ…	Glycosyl transferase family protein	MNYQLSIVIPVFNSEQYLPRLFKSLGEVPPEVEIILVNNGSTDNSASLLQHYHETHADTVIIDENRRGVAFARNTGLDNSNGKYVWFIDADDVLLPGAVNRILRVIKGTGFDLLVFDYLSLVEKDKVPKEAPAVKKAEKTKLADILHEMLTGAHDPIGGFPHNKVFARKLIGTERFENLQYAEDLAFFLPILLRANNIYRLHDALYVYYQHAGSIAHKINTEKLTDYAKVVDEVERVLRSSDVAANKDVDEYILRRRLSIYFQNLAASNDLGLKRHIRDKMAQYSFKKLMLYKKDKKLVIKMLLYKFRVLDIFPFLLKYVY
Transport protein	MRTKHNVYLPGALALYFSYAMLGVASSILSQYKGQFASNWGAQELANGTVDVSMVVSVIAAFGLGRLLAYPFAGPVSDHFGRKVSGTIGIGLYIIFFVGIITVHSFWAAYAIGVLNGMANSFLDTCVSPSLMEMFPESASIANLLTKFAVVIAQFILPFFIGGVAAAGWSFQTIFIICGIALVIDALAILLSPFPNRDLPKTNAAGQSEKMHFSLGAVAAILIGFTSSTTFMVWLNCNQELGAAYGVKNPASLQSLYAVGAGIAVLLTARLIKLGLKESTVLVVYPVISVIMLLLCYFIQTPSILYIGSFVIGYAAAGGVLQLATSTTINFFPNHKGTATSLVMIASSIANYAVLSGAAGLTKLFGDDAPRMIILLNVAITICGIGLALIVKAQEKRIP…	Ribose ABC transport system, periplasmic ribose-binding protein RbsB (TC 3.A.1.2.1)	MKHTFKRFLTITVIAAAAIFTLTACGNTGLGSKSDGEAKVTKKAPKDLKVGVSLSTLSNPFFVSVRNGIQDLAKKNKTNVQVSDAQNDTAKQNNNIEDMIQKKVDILIINPVDSSAITPAVKDANDAGIPVITVDRSSDGGKVLTLVASNSKKGGEMAAKYMIEKLGKNAKIAELQGIPGASATRERGKGFDGAAKGQLDIVSKQTAGFDRAKGLTVTENILQGNGDIVGIFSQNDEMALGAVQAVKAAGKKITIVGFDGEADGIKAVKAGDMAATVAQKPEEMGRLALQAAYDHFDGKTIKKNIESPLSLVTTEDANK
Protein, hypothetical	MKRKHIFQVLVGTLIAGYLTVFYGMRNTIDTSFTQHAVQAATEQTNQLYTSTKRAFPAKNLSKNAVTSTQSKLEQLAQNVDDRDQKKVVLKDKQDADAASHMLTIEETVKTQNGNLAQIAEDGSRANAAYKAIANTKPEFAADYQQQVNQLYKKSLAIAQIQKLYQDQNMQHPKANLSSDSIDLAVNAVENVENQDFAKNVLPLVQVARNSQESNDSDVAMNQKGASSQSQQTGRESAASDDEPASGAGTTSTPSSQKTPSSISSQQPAESSQPSSSNPAGSSTSASDDQGQSSSTPASTGSIEPLTTVLSGGLYKTYDDAVAAIKVQGKSVDDMTVKSVTMSDGSYQWTWGPNGDSGSQTSSSSAAASSSTGASSSSSRTASSPSSNANQASSQAN	ABC transporter, ATP-binding protein	MTILTLQHVSKRFGSKQVLKDLNLTLPTGSIYGFVGENGAGKTTTMKLILGLVRADQGKIEVAGKPVRFGDTTTNSVTGYLPDVPAFYPYMTAPEYLRLCGELTGLRGAVLTKRVSSMLDRVSLAGVKQRVGGFSRGMRQRLGIAQALLNTPQLLICDEPTSALDPQGRTEFLALLASLRGQTTILFSTHILSDVERICDHVGILHQGRLQVSASLADLKKQYAKPQLQLTFETPSRAQQAAALLASQQHDGYVKQVRTSGSEVTVAYSESYAATADRVLTALLTAQLVPSSFRRREANLEQVFMEVIK
Protein, group	MDIGFAVRSDFLTRKGGDSVQLLNTMKYLESDFGARCTIVTSPEKLKEKRLDVVHIFNMQPQTIDSSLAYAEMAKALGMKIALSPIYWRLDESFINGALARKGIIDAPKVVVKLATFVSKLLFRDILKKKNFFSRELFLKADKLLQYSDIVLPNSPEEESILKKTFPNATTSNKKWGVIPNAVDAKKFFKVNEQPKQLPDNLKILERLSGKYVLCVARVEQLKNQLRILKALNNHPEIPIVLVGSTKGDSRYVESVKSYAKKRGNTYFIGEVSQQDMAFVYSNAAVHILPSFQESAGLATIEALFCEIPVVTSTEYFCPINFYRFNEFGFQCNPYRLSSVKKAILSAMQNKKDHVGKDYRSFFSYKNAANSTYKAYSTIV	Hypothetical protein (FIG00750997)	MKKLLVIVPLALLLTVAGCGQTGQNNHAKASSNISQTNKSTKESANRESNGVNGSKKSASLSSSNQVGSKASDSSSSKNLPEQRYAKLKKSVFNQIASAKWPSSYAVAESQYLNIFATGDQSNYSIFFSPGSVALPFNDPTLQNVNAELAIQKKTYPNASDAQAQVAVSQSTASLPKVALGDGIEATSQGAAGSTYLTWTEGRWIVTVKASAINGEDPLPLAKQVVAWFASHALPVPDQRGTVDLTVTNANVRQNQITWTEGNALYMISGLEPIKTIQEGTATR
Glycosyl transferase, group 1	MIRTLVVADFLPASGVTTFVENAFLKQRQGFSFSALAIAGDESNKLHFEKAGWTFTDISPANKNYIRHIKDWLKFARRNKHAFDIVYFNYSASWNILPIFFCKFIMHAKIVVHGHNTYFGTEIHGVKKFALTVFHLIGKQIAATFLIDSFVAVSNEAAKWMFPSRILRKNRVEVIPNGIDLSDYTFKRATRVKVREALDVQNKIVYATIGVLEMRKNISFALDIFAAIIRRNPNSVLLVIGDGTQREMLKQKARRLELGDSVRFLGRRKDLAQLYNAIDVLLFPSLNEGLSFTLIEAQANSLPVYVSDRVPLGNYLPNLVHVVKLSESSDSWSKRITATEKHVRVDESKRMKKIGYDQLDMREHVLHLLEALQGGNTE	Hypothetical protein (FIG00748020)	MSFLWLRLPRKRLLLAMSVAFTISALQMIQVLGPIPPMDSPYTRWLSIDPFNFSPIIFFILLPLIASIPAASLLKEDADSGLLAKVKLCFPVQKVIRSYVGLAFLTGFILVALVLSLNLLFYFMMLPNVRPDNLLNSNILLTNQNTLFVSLYYANPLLHALISILFASFWGGLFAVFVMVTSLWIKHVFVALSTGLIVQIAILMLNSLIMLPDLVSFSPADFLHEMAPNTNISLPVTGLATLMLLTYCLVFARIGVKRLVP
UDP-galactopyranose mutase (EC 5.4.99.9)	MKLLVVGAGLFGATVAHERALKGDQVDVIEKRSHLAGNIFTEEVEGIQVHRYGAHIFHTSNKKIWEYINQFSSFNRYTNEVIANYKGEIYNLPFNMNTFNKMWGVITPAQAKAEIDKQRASMAGKVPQNLEEQAISLVGKDIYEKLIRDYTAKQWGREPKELPSFIIRRLPVRFTYDNNYFNDLYQGIPEGGYTQIVEKMLDHANIKVHLNTDFLTHKEEYLTRYDQVVYTGMIDQFFDYQLGALEYRSLRFETEVLDVDNYQGNAVVNYTDSDTPFTRIIEHKHFEFGKGNQGKTVITREFPAEWSKGDEPYYPVNDTKNNHLFTEYRDLATKKYPQVAFGGRLGLYRYYNMDQVITAALQFVKGKFFATN	Hypothetical protein (FIG00751167)	MTAAMVFTKKELIESWRMHRFLILTVVFLIFGILSPLMAKLLPELLKSGLGGVKVTVPTPTSLDSWTQYYKNLTQMGIYVFALMLGGCVSQEIQQGTLINLVTKGLPRWSVIVAKSVVGLLQWLWCIGLAFAVTWAYTAYYFPDTHSPHVLLAVLPLVIFGFFFLSLIVFGSTLATNQYGGLLFTVIIVALLYVAQMIKKGHNLNPISLISDNMKILVNAADFAKLWPAMVVALVIGSGLFFAAIKVLNLKRL
Galactofuranose transferase	MLLSESISTFFESGKIMIEFDGYNSKSFDAGFKARADVKYFSNRMGIKTAEIPATRVNLKINRELQRLRAVRSLSKKLSADQSVLIQYPLPFNSFDYSLLHKTLLKHNAKCIFLVHDLISVQGQAKNVSIKQEIEELKRADFLIVHNQAMQNFLEDQGLSQKMATINFFDYRVDVEPPIRSEVANIVFAGNLVKSKFLKKLPQLEIFKWHVYGSGMTAEQFPESVVFHGAIDSGVLPSKLVDGWGLVWDGISTDRISGVSGDYLRLNSPHKASLYLASGLPLIVWRESALANVVLQLGLGIAVDNLMEIEPVIKSLSHTQIEKIQTNVQIISQKIRNGGMLKDALESLPVGFDA	Putative N-acetylgalactosaminyl-diphosphoundecaprenol glucuronosyltransferase	MGNTPVVSVVMPAYNAATYLPNTVQSVLEQSFKDLELLIVDDASSDHTSEVVGKLSATDSRITYIKLDENQGVANARNVGVQHSRGEYVAFLDSDDIWLPDKLKIQLTFMQQHQVDFSYCSYEVVDDHGTKIGERKISETKLDYHEMLKGNRIGLLTVMLSRKIAQKYPFPEINHEDYACWLSIARNGTVAYLASEQILAKYRKHQTSLSANKIQAAQWTWTIYRRHEHLGLFKSFYYFLHYSLMGLTDKR
Hypothetical protein (FIG00746973)	MKVTIIGAGNTGFACASDLKRRGIETTIFSRDPVKAAKLTKCSFTITGRITTTTQFRVSANLAASVNFADIIIIATWANAHEDIISAIKPFIHQDQTIIFLNGNWGMLQAVAKLTPDWIIQKHVSILETSGMPYVAQWHNHSLHISEIKTKVTVAAYGNQQAWRKGLNLLKQLYSEISVSPSVLQTSLSALNPIIHVPVSLFNLPRIEHAERFHILTDGLSESTRAYIMRIDTERKQLASVLDIPYSSIVHQLATQWGTDFDTLGEVFHGLATYRNLPAPTNIQSRFIIEDLPYGIDPLVRLGKILSVPLPYSQKLATFAHAVFDQVPEPDLRFINSETIAAVQSNNPANDLD	Polysaccharide biosynthesis protein CpsM	MIPKIIHYAWFGTTPPPFIEARVNEWRTQLPDWEFKFWNDKNFDLSKYAFSEKMYQAGKLGYAADELRYAVLYQYGGFYLDTDMIVKKDLAPFLNQKMVWGFQYDNSILTSFIGAESKTPLLAEILDVYAGRKFPDLQDDMQKMTSNPVVTKILMRLYPDFRMNGQRQELAPKITVYPRDYFTYASRNSNANYMEHLFDNSWGSANLGMRGRLKHAFKTVFPYLWADISARRGIKSAERDGIPYQR
UDP-N-acetylglucosamine 2-epimerase (EC 5.1.3.14)	MLDQVLTTFHIKPDYDLNIMKARQTLADITSNVILQLGQIIAKEQPDIVLVHGDTTTTFAASVSAFYQQTKIGHVEAGLRTWDKYSPYPEEMNRQLTDVLSDLYFAPTEQSRANLLAEHHPEEQIFVTGNTAIDALDQTVQTDYHHQVLDLIDPNKKMILVTMHRRENQGEPMRRVFRVMREVFETHADIELIYPVHLNPVVQETADSILGHHSRIHLIDPLDVVDFHNLAARSYFIMTDSGGVQEEAPSLGKPVLVLRDTTERPEGVQAGTLKLVGTEPETVKTAMLQLLDDHVEYQRMAAAKNPYGDGRASDRILKAILYEFGQVTERPQSFRA	Hypothetical protein (FIG00742190)	MIWRLFCNQLPFFWYLIRTRFLFWFILMNAVVILLSMQTAGNPHATIFSLFFDGVSFRAAETHRVVLPVLWFAYFFVPLLILLNGLQQLWHTRTIHLRGLQIPPRKFAEVNLMLIALITTIYEVGAIGIMAIAAAFNLHFGNWQGLAAVGGLFVTTWLGVFLLLLLQAIGNHFSPSLALIIPACLLIVNAYTAIRMNPLGYLMLTRINATNAWHPILVLLGVSSLATMGYLAVERHASLN
Peptidoglycan N-acetylglucosamine deacetylase (EC 3.5.1.-)	MRRKKRQHSSSKNFMVLIMFLTTLIIVGGLLVVRQLVATQQRQDDLASLKKARVKAAASRSRLVERQRASIARSKQKTAESEKPSMPSGQSHLATASAYAYPVAQVKQEMTVPNTSNIKEKVVFLTFDDGPNTVNSSRVLNILNQEGVHGTFFVVGRQLSPTTVPVLKAIYGAGNSIGLHSMTHNYNVLYPGRVGATAAIEHEAKLEQTMVKQALGPDFVTHLWRYPGGHFSWKGLADADKGLARLGLDWIDWNAAVGDALSQAQEPKTEAAMLQYHLRSLAVYPTSQVRVVLMHDALGKDLTVQTLPKIIAYYRDNGYKFGVLE	OrfB	MFSEEIRGDVEVFEDKYKMSDAEEKLLFEKNLPSMIYLAGKYENLSTTLLDTKAIINNLTISGVKPDDVEVVLNLKAAYKYIVGLPQTIQFGIEQIQKINLIIQGAGTPDAGKFRTKTVLVGLTNEDYVPAIPNEANVTKNLEALLTSQKSATEKAILLMLTLSRQQIFTNGNKRTAIVAANALMYQAKVGLLAVPEKKMHWYLSQLAKYYKTGRADQLKRWLYEHAVFGIE
Alpha-L-Rha alpha-1,3-L-rhamnosyltransferase (EC 2.4.1.-)	MTFDHLVILMSTYNGERFLKQQLDSIVQQDYENWDLIIRDDGSTDSTQQIIDDYVLKDNRIHSFPDSAGNRGPANSFLMMLTSISAPLFMFADQDDIWYPNKVGLTVGSYMQQTSSASVPTLVFTNMDTIDASGTLIQSNIVPENARVSVNTILVTNIVTGCTVLINKSLADRIRLSDTRSIVMHDWWMAMIAAFLGNVVYLPTATIGYRQHGDNAVGVNHSFRSRINKALNYSNQRKLFSKQMAQIKLLDTRFGKNLSVSRKVELDSLISIQRSKRFLSKFSWLLRHRAKKTSLVGTLSFYYLFLTTNVE	Tyrosine-protein kinase transmembrane modulator EpsC	MDNLLSMKELLVSLRKNWWLALCTLLLGAVIAGGYAYGVKKPSYSSTALAVVNQQKNNTESLSQILNQNQYDSELLATGKSLVKTAAVYDRASAQLLQKEQLKISSGDLQKQVKVDNEDNSRAFSIHATAKNANDAASIANEVAAAFQKTISSITNHTDTVTILAKAEPSDVAAGTKPLVLIVIGAIIGFLVGLAWIVLREIKQATIKTKETLIKVAKAPVLGVISTKKL
Prophage ps3 protein 01	MNQPYIIKDHTNTFLIRGKEYKVTAPAKFDRRTGELIPDQRLDDAAVALANAKYRQEMDIVSPEEIKKYRARMNLSQRELADLMGWSPTTIALYETGAFPSESNNRILKALINDDDFLASFISPNQQNLSKKIVKKMTSYLSDRKAGDTSLKHNTEFTALQLTNWFRVRNYFSLKTDPNAEELTQMKVVKLLYFAFGRWIAKTGGELFTSKIIAMPYGPVVEDVHKKYNGRRGIVPQTLEKSAFEDFNLVQSDRKIADLLRKVDNDFRGYTAAGLVHLTHRKGSPWDVTRSGVIAPQLIKKTFDQHQEM	Hypothetical protein (FIG00742395)	MYHNVIRQQNLLTPAFLKVYLVCGLITAIISLTGINLIGELTSSPEQIMVLIFPRYLIFSGLMPTYLLSLLPCIQPRVQDVLLYQSRKIITLQILYRVSISTLLMAGIWSLTNITVITVNGAAYLLETIWLYLLIHAVYLWLACFLLGLIAATIVLATKSKLMAFFVSFGICGLSFFLVISHLPSLLFDFSARDSNPLLLAKGIIMLGLVCFMTALLTAIVNRRDL
Membrane protein (FIG001614)	MIMVNTLLLILYALIGVVMAIAGIEAFRAKDNPARIGTGLFWEIMAVIFAFGTLMPAMVVGVLVVIIGILALFKQIQIGKIKPVDGAHAATAAKRLGGWVFVPSVVLAVVSIGVAQFTKLGGQVGIGIGAAVSLIVAIIMTKAPGKMVYNDTQRMVRSVGAAGILPQLLATLGAVFTAAGVGSLTAKLIAGLFPTGSHLGGVILYCVAMALFTIIMGNAFAAFAVITAAVGIPFVIAQGANPAIVAAIGMTSGYCGTLLTPMAANFNSLPVALLEMKDPLGVIKQQAPIAILLLIIQIGLMYFLAF	Hypothetical protein (FIG00754398)	MTNELAHQFVSDASVSSQEFRTLRNNLSLQMSRSDRPVLLITSATEGEGKSYVAANLAASFAMEGKKTLLVEGNLHRPILASVFDVKDTEGLSSLIHVNDAQAVNVDDLVINTKIQQLAVAPAGSELGDPAKLLAGSSFKAFLDQVRHQFDLILIDGPAMADASEAGLIAEFATGVVIVTKANGPSKHRVAQTIAQVRQLPATLIGTVLNQA
Bacitracin ABC transporter, ATP-binding protein	MDYCIQTQGLSKHFKGVTALKSVNMNVKLGEIYGFLGPNGAGKSTVFKLLMALLKPDAGKIMRQAETLSQGLNGFFRQTGSIIENPYFYEDLSGYENLKIHARYMGYYVENDAQTKIKDILRLVHLSDTEKKPVRAYSLGMKQRLAMARALLCDPKLLILDEPFNGLDPEGLAKMRQLLLDLNQRQRTTIIISSHLLSEISAIADTIGVLKQGVLIQEIAMEKVRQKERQCIEIKVSNPNRASCVLEEKLNIHEFDLVSNHKILIYDTEIDRALLIKTLVMNDVGIKSAFLKEGSLEDYFLKLTR	ABC transporter, ATP-binding protein	MGLIELHQVAKTIKRRQLLHHVEASIERGSITTLEGINGSGKTLILKALLGLITVTGQVVVAGKTVSPQEAYPIKAGILIENPSLIDDFTAMKNLELLARLDPTIQPQQLDDLLTYFELTRFPTQKVRKFSLGMKQKLGIAEAFLGGYPLIVLDEPTNALDHDSIIKLIDLIQRFNANGSTFVIASHNHEFVEQVATHKLSVKEGTIQHES
Shikimate/quinate 5-dehydrogenase I beta (EC 1.1.1.282)	MAQKDEIDGHTVLAGLLAHPAGHSLSPAMYNAMFEALGLNDVYLSFDVDVPELGHALQSMRSLHFLGGNLSMPHKQRALPLLDKLSPAAKLVGAVNTIVNDHGVLIGHITDGTGFMQALTNDGIDLRGDKLTLAGAGGAGTAIAIQAALDGVREIAIFNRRDASWQNAQRNVAVINDQTSAHAQLFALDNHAALKAAIADAAIYVDATAAGMKPLEDVSNIPDPTWLNPEKIVFDTVYVPRETKLLRIAKKAGVKHVYNGISMLINQGAAAFNLWTGLQMPVETIRETIFGESEAPLKNTATA	Hypothetical protein (FIG00747667)	MKVNPKFWMISGCLVVFLGIIGFLRYQQVNANPQQRGVIKEVLIKRGQLVHAENVDFRVSKVQVLKKKDQVIVPVTLAIKQTGPANYGHKKDNPNYIENMWLNIPYSMSSQTDTIFDNNKVRVKPAMHPSAVRQPLTLQFSATRTSYEHRNQKMRFSFLVPVENYLVKYSLLLE
Mobile element protein	MEALAKEINLDTKQPYGISFACQFLEISRAAFYKWRNRKPSVHAQENKEIAQYIKSLEEDNHYIFGVRRLVIYINRETRFHVGATRVRNIMHKNHIVAAIRVAKRDRKAEKKEYCFANKLLTNDAGHDFSPERPNMVWVTDCSELTYGDRMQYRLRLSAVKDLFDHSIVAWRVSPTETTLLVTNTVEAALKNTGRLKPDILHSDQGSAYTSRGYNMKLVGLGITHSMSRPGTPGDNSPMESFWSHMKTEFFRFEHALSELEMVQLIQRCVDWYNNKRRQETLNGMTPLEYRNHAVKEIA	Ribose ABC transport system, high affinity permease RbsD (TC 3.A.1.2.1)	MKKGTVINTQLSQVIADMGHFDLLGIGDAGMPVPADTWKIDLAVSRNLPSFMDVLKNVLTELQIQKVYLAEEIKTQNPKQLEQIQQLIDVPIVFIPHDQMKKDLSKTKAFIRTGEMTPYANILLESGVTF
Transcriptional regulator, LysR family	MNLFHLRYFATLAKLQNYTHAAQQLHITQPSLSNAIHGLEAELGVTLFARQGRHMILTAAGREFNRTVSHTLATLDSGIERLQHQAHGQTVIKLAALRTLSTRWVPSMVRHFLETRSQDVRFEFTNENGLSPKIIQGLRAKKYDICFCSKVDEEEDIAYFPIASQALVVITPVNHPLAQRKQIELSETLPFDQITFSKKSGLAPIIRQLFAECGAQPHSVYSIEEDEAVAGLVANGFGIAVVPNMPLLQTLPLKVIPLSFPTWQRIFYMATLNDHYQAPAATDFIEFVHQHHANISL	Hypothetical protein (FIG00749197)	MQTNWAFFGTYWPFLVPLIILEFGLMITAVVHVLRHPHYRIGNRTLWLVIVIFIQIIGPIAYFVFGREDQS
Transcriptional regulator, LysR family	MGDDLVKDTTQFLTYLRTIISTGSVTAAAKRLYISQPYLSRTISEHERRLGYRLLDRDKRPIALTAIGVQYVRTLEQLNNQYNKLMHDLEKMADVSHLRLGINQSMSTIVAPPLLYRYHQVHPESQIAFTEGISSELGDLLLSGRIDAQLRLMPIFSNEITYYPVCELPVYLLVNDSSSLFTPGRREILTLPVKAAQFDQLAYITLDSGSGFMRQLSVFLTNKRFIQGRLLTCGSFKLPLILRIRAWDAHLCRNTVFAASLMRLNVILSRYPWSNCPLRLFLHIAGIPDWRAKYNS	Hypothetical protein (FIG00745994)	MGYRQFAHTHHLLSDSGTTAHYPYLLASAYQISRYLAGDA
Hypothetical protein (FIG01116301)	MKKSQLAFIVGSAILAFFLVSCGKSSSGNANNNSKVKTVQIVGPSASQPYQIYKSKDELSGYNGAILAAIQKDLKSKYKFQYQVTDPNSVFVGLQSGKYDLAVGNYYYSSERAKTYDYSRRPTLLSDLRLVVRKDDNQITNLATLAKTNGKLEPIDVSDPRYGIVEDWNKKHPDQKVALKSSGFVDTANQFKDIVNKQYDAILYPRTNFDTAQKKLNEPLKLSKSIAVFPVVYYYHKNAGNTQLRQDIDKELTKLRKNGTLAKLSQKWLGSDPFTAKNDRVTDVTKSYAQEK	Hypothetical protein	MYNRYYILWSKDDTMKKTYSLAFIFEALIESRTRTVAL
Shikimate/quinate 5-dehydrogenase I beta (EC 1.1.1.282)	METWISGTTQLLCLLGSPVGHSGSPAMYNFSFQKQKIDAAYVAFDVKEDQMPDALKAMRLFRMRGGNVTMPCKNVAATLMDELSPAAKIIGAVNVIVNENGRLIGHITDGIGFVRNLKEHGVNVKGKKLVVLGAGGAATAIEVQTALDGAKQVAIFNRQDAFYTRAETTAKKLAQAAPDVTVTVDHLEDDAKLKAAIAQADILVNATTVGMKPNAGTSLVDPAYLRSDLVVADTVYSPLKTKLIEDAEKCGAKTAPGKGMLLWQGAAGYKLWTGQDMPVVEYQAFEASH
Inosose isomerase (EC 5.3.99.-)	MTLTHPITVSSWTLGDQCKFEDRVKAAAKAGYDGIGLRAETYVDALNEGLTDQGILDILDQYHIKCTEVEYIVQWCEEPRTYEQKYKEQTCFHMCHLFGVEHINTGLMESYPVDFTAKKLQELAHRAALAGNLIIALEPMPYSGMPDLKKTWAILQGAGAPNVMMLLDMWHWVRADQPFDLLTKEQAKRVISIQLDDAYKRPYAKSILRDESMHDRLAPGTGFEDRTEKFIKMIKEAGVDPKVIGVEVISDHYMAKGIDWVAKYTYDTTVKTLQAAWPEILKETVATH
Short-chain dehydrogenase/reductase SDR	MKDFKGKVMIITGAAHGFGRVIAEEGAKRGMKLALIDIDQAALNETYQLVVARGADAIMIPADVTKESAVNTAIDQTLRTFKQIDLLINDAGIALPGRMWELPTRDWEWILHVNVMSQVYMMKRIIPIMMAQKTHGAILNVASIAGLVDTPGMPAYHASKFASVGLTEATAYDLQRAGADIEMHVMCPGFVQTDLYHTEKHRPVQYQDSSDPYYQSEAFLKGQQFAKYVITNGMPIDTIAATVFKALEDDQFYILTHPEFNPLILDRINRIVKNGAPDVHVMDGIM
Mobile element protein	MTSLRSQYDLNELLKSLHLPRATYYDRLRRDKKPDKYAEVKAFIKKCFFGSKETYGYRRIHDEADKVGFHYAEETIRRLMSDMGLKCVIYSKHTSKYHSYKGHVGLIAPNILNQKFETTQPLTVFHTDVTQVRLYNGEWGYISSITDEASREVIAAIVSASPNKALIQASLDELEHHLKEGIKPTLHSDQGWQYQMVDYQQCLKAMNIIQSMSRKGNCHDNAPIESFFNLLKRECLNRYQINTLSDLRKLVNGYVDWFNNVRISRNKNGLTPVEYREQAMIA
Acetoacetate decarboxylase	MSSYVVAQKDVEKFLNLPSMNDQEGISFAYATDPDALAKLIPAPLKLVAPIICGYVVHMGRPSFGAPYLEQTLFALVSYKDKLVGSYPLTLLLHGPGAEAGLVAGREGASIPKKLADRITLRRNDQTATATVARHGKTLLTVAWEAGDVNDPEILKTFGSQFALNQESIMNSFFFDYQLVQDEQGANHFSNVALLATQMKSLADRVEPGKLTIKLDSTEDDPFGELPVLKPLGAMWYHFATSTMFKTLRLEEVNANKTAPYLITGRYDRSMMNPFATTYTI
Protein, short-chain	MMTDWLGLKDKVVVVTGAVGGMGTHFCQAFAEHGAKLALVDIKHDAVAAAANKLSDQYGVQTLALATDTTDEDEVDAAVKAVVDTFGHVDVLVNTAAILRFSPFEDLRLDEWKTALNVNLTGYFLMSQRFGRQMIVQRHGTMVHISTVAAVFPETYSGAYSTTKAAVNMLSKQMAAEWGQFGIRSNCVMPCLVKTPMSADFYKDPKVREGRERLVASRRIGDLDDITNAVLYLSSERSAYTNGGELRVDGGLGIMMQDMIPKPGGRREYAIKAHQPQK
Two-component response regulator	MPSCCKHGFKLKHEAGGIRFKINVIQEEEFKISNAKILLVEDNREFSELLKLYLQGEGYILTRVFDGKIAMDTIKNNTFDVVLLDIMLPEKNGFNVLKELRQTKMTPVIIITARDMDQDEVLGLSLGADDYLKKPFSLVALNARIKAQIRRTTQYAVYGYEKMHTQSQVTFADLRLDNLNQTVYKNDRRLNLTVKEYRLLKLLMIHPGHVFSKQAIYEKVWGESYIGDENTVNVCIKRLRDKIQDVNQRYIRTVWGIGYVLEAGVE
Protein, glycosyl	MLIKIIIAAHKPVQVPNDQTYFPVYVGSKFHESTPKGFLRDDSGKNISWKNPHYNELTAIYWAKYNLDFDILGLVHYRRFFVNKKKFGSRSYDLIKQSDIKKLMAHTDVVVPKKRHYYIETIESHFYHSHDRQGLDCLKKVMEEQPEAYRFAFRKVLNARSAHMFNMFIMKKKVFQDYTNWLFSILDQVDELLDFNSLEGNETRVDGFLAEFLLDVWLKANEVPYTECDYKFTENQHWIRKIYGFLFNKFNRRKFVTTHISNNRK
Hypothetical protein	MGYDPNQYNSSNDFYAQQQHADLEQLSATIANEKYQDRIMQLRIEIAKAPNVAVRSELQRILYEEKQKHRNRIILSFVFLVIALIAVSFLALYFHSASSASGSGQPGQVTPAVTSESSSNSDANSVEETSYDSEDDAETSQYEEDTDPSAATVSNEDYIDHGVVKTTKNYPSNTSLRNNNTSSSGITGHWQSGDATTFDFNDDGTYSSTTNGKSTSGTWKIVYRSGNILNIQFTDSSGHTVVEPFALDNGNLIETNLKIKWSQVN
Putative amino acid ABC transporter, ATP-binding protein	MPLLEIRELTKKFKGKKILSDLNLTVNSGETLVIVGKSGAGKTTLLRCLDLLEQPTSGHLTLGGKTFDYRHLTASDIRSIRDQLAMVFQNYALFNNKTALENITEPLIYGQHQTKSNAKKIAETLLAQLELTDKANLYPAELSGGQQQRIGIARAEALRPSIILFDEPTSSLDPALVGTITRDILSLRAKGQTMIVVTHQLDFAQHIATKCAFLHEGNLVEVAPAEQFFKHPSHQETAAFLKAASEEAKV
ThiJ/PfpI family	MGAICSAVDYLAKNGLLTNFKHTGNAQYLWKDFDQYQNKSDFFQEKTVRDHNLVTANGAAPLEFTKQVLKMIKFKNSEQIDKNIYLCEFGFYQFCKKVWQSILLIKLYRLSCLGGLTLKITCIFWVGKKSSLEHVIPEAIGINSFTTNTVCADYDGALGATIEIKREILELEGCKWNMPQVLRLGKDSNGNTIILDKDPGPKYIPKVTEKDNGFSVMANSKKETAQIIKKGKEAACSTEAYR
Mobile element protein	MGRKGSRYTLKEKLFYIGLVAGGMTAGAVQKKYGIDHAQITQWVDRYEAEGEAGLKPRDSHTRYTEEFKLEVIKAFLERKASSPALARQYGIPNHGVIYQWVSLYTSGKSLATTNRRGTPVKDGRDTSQAERIEIAEWTIANNKNYIEATKRFKVSYGQVYSWVKKYVQGGPDALLDRRGKDKEDNGQLTEMEKKDLEIKRLKARLKYVSTEAAILKKLQEIERMDAQQKKNIVPWRRSPKK
Hypothetical protein	MLKFFVKAALASRIWVLCIIVPILLFLISVFSFSDAQSTFFLRENNVISHNITVIKETQTTLLDSQGNVLPENRRHFDDLGELIDELQLQKQSLQSFDADEYLQKTKVIFESGSKYLKKYSFWPLGESQKALKNNYYKVATLIKQGLPYEDEKFSLLYPLGAVSFLKNFETFPFLVLINVLTLLQIVIVEFGSSRAFMILNDKKQISLPLISFASSLLLPIIIAILVVSLSILYLKLFSEW
Bacitracin transport permease protein BCRB	MEMIKLEFVKFRLQRQIIGVALTIIGLLLFLTISFVDNKVHTNQVLDTSQSVQRMIAFLAASMFMVYAAGLISKLIIGEYNHRTILMLFSYPINRKKIIGVKMGLITVFTLISTFTTCLLAHFYVYCIDHQFMVTANTFTLTSDVLMGYFYCSLLAAMIALCPFILGMIKKSIIATMATAVLGIIAIQTMVPKVLVWNRDFLRLAILGLALASLSYIIVQTKILDFDK
Putative amino acid ABC transporter, permease protein	MGFATFVKVFQQLIPYLGITFWIIGASAIFVLVFGGLISLTYFTNWVGWKFLYNGFVSLMRATPVLLLLMLVFYGMPFLSQLVGIDISWWAKTSFAILAIGLENSAYFAENLCSAYASVPQSQYDACTSLHFSRFNAVRRILGPQIFVAALPNIGNTLITIVKNSAYVYVIGITDLYEQAQVIAQASFGKNQVIVFIALSLIYWIICIAIQALFAQLERRRAWSGGAQ
Undecaprenyl-phosphate galactosephosphotransferase (EC 2.7.8.6)	MEKQMLTTHNENEISNIRKQASLIYLFEKRSFDIFCGLAGLVLVAAVSLVLLPFYSYGRNKGPLFFKQTRVGRHGDRFKIYKFRSMVVDAEGVLHRDSALYKKYVANNYKLPVGEDPRITRLGAFIRKSSLDELPQFINILKGDMSMVGPRPVIEDELAEYGDHVNELLEAKPGAMGLWQASGRSNIGYPERADLELYYIRHRSFHYDLIILFKNIASIFKAEGAF
Permease of the major facilitator superfamily	MQREIRLRWLLTGALLSSIGMSFIWPLTSIYLHNRLHISLTVIGVVLLLNSLGSVIGSIVGGRLYDQSDPFRLTLFGVGLTGIVLIGLTIWHGWPAYCFWLALLGIGSGWNITMVNSLGTSLRSKDGRYVFTMLYFAQNVGVVVGTSLVGFIYDISITLLFLIAVILYVLFFIVVQNFSQHPKSHVHLQKKRRQHPQKPHYRQQIT
Protein, PTS	MAKNYEQEAKAILKLVGVNNVDSVTHCQTRLRFVVKDRKAIDDKALEQLPEVKGVFYGSGQYQVIIGTGVVNDVYAAIAKLGTVNAIYGKDDADTTAAASDEHKTWVQRLMAMLSGIFIPIIPVIAATGLFLGLKSAATNAQVLKLFGAVPSDIPASLTSVVSVLTDTVFAFLPALIVWSTFRYFHFATLKGRRLSGL
Malolactic regulator	MMPKWPCSTSNLHSYHHLRASPFQRVVSNQVASSITRSPAQKPACKGLKRNGQKPAITLKATYTPASDRADSRSLSITRSPAQKSACKDLKRNGQRPAITLKATYTPASDRADSRSLSITRSPAQQSACKDLKRNGQKPAITLKATYTPIANRAGSRLQKKNHKQVYVCGS
Hypothetical protein	MTQVTVRLYEQGDKVWRDFKAELLKRYENSAMLDISKIKAFSKIEKQEFNNRIVVSKKAIVEKRAVAGVDDSDTLKTSVNNGLEKISKKRKEARAKYARGIAEAASQCNTLIDVAKRIGKSTTFVKRVASEFEIKLPRRNNGHEEIVSR
Hypothetical protein (FIG00747084)	MKNGFLKLPLSVQGIVIMVVWLAVNAIYIWYNWPVNKFDFAPAFLPVFPVLISSRSGVVITNWQPCMAIIVGLTSWYLIRQTRMQKTKSPLFIRLIRHLLPVWLFMGTCFLLLNHSLTFQLLT
Mobile element protein	MRLALIIRLTIGKAYYENTFRVFHHSLFKREFSKKTELLSKVFDHDHERYYTGFRALTLGWSDGNTLLPLNFAFMASSKKKNQVSPQKPCDGRSLAAKRRQQAHRKMNLVAT
Hypothetical protein (FIG00744235)	MEVDKVKAIFSTDEDGYITGYQQEFWDGTQWQTPFDDEKAIMIAPEELKKIAIGASKLADDGTVVIDTDKQAALDKAANQVTPTAEQKLLANLTLEVAQLKAAKSSD
Hypothetical protein	MLIMTMTMIHYFDDDDEAVDDEDDGYDAEIEKALADVENDPEFEEKAIDFSSPQTQTLLDLLSRFIESSALDRLPEKVKTPTCSPC
ATP-dependent nuclease, subunit B	MIDKTETLALVGMVVGGWWLGPYARRLTLTITRSPAQKSACKDLERNGQSPAITSEAAYTPASNRAGSRSAHHNALPGAETCV
Malolactic regulator	MTTTQSPRSRPLIFWFTPITRSPAQKSACKDLKRNGQVRAITLKATYTPTSNRAGSRSRSETRSPAQKPACKDLETKWP
Alpha-galactosidase (EC 3.2.1.22)	MPITRSPAQGSACKDLRRNGQRPAIAPEATYTPIPNRAGSRLQKSRLDHVELIKAAFLTYTTMANNYLTCFGVP
Hypothetical protein (FIG00746567)	MWHIIERLMREKGYSIRKFSRVAGYKNPTTIYSIKTGQSKDPSFSTMIRIADALGVSLDELRPDKQGEKKS
Malolactic regulator	MIWANVLPAHMPIRFSRIGSRAITRSPAQKSACKDLKRNGQDRAITLKATYTPTSNRAGSRLQKKIQRLP
Hypothetical protein (FIG00744395)	MWLPFQRSFNIGENVEYQPIIDENGVISLLPVKHHIFRGDAGYDLRQAMLEENIGDNDIPIGREDAWHE
Alpha-galactosidase (EC 3.2.1.22)	MLVEVGCLASALGHGLTITITRSPAQGSACKDLGRNGQTQAITPKATYAPVSNRAGSRSP
Cobalt-zinc-cadmium resistance protein	MLLTIGIRVDPKMTVADSYELGERVERKLMDAYDILDADVKTYPADLPPEDAPQDP
66 unique orthologs all together in cluster A		35 unique orthologs in cluster B
8 orthologs are EPS related genes.		10 orthologs are EPS related genes.
