# Supplementary material for: Genotypic and phenotypic diversity of Lactobacillus rhamnosus clinical isolates, their comparison with strain GG and their recognition by complement system
Source: PLoS One. 2017 May 11;12(5):e0176739. doi: 10.1371/journal.pone.0176739 (PMC5426626; doi:10.1371/journal.pone.0176739)
Supplement: S2 Table — Experiments showing the survival of strains L. rhamnosus GG, clinical blood isolate of L. rhamnosus and st369 a group A streptococcus in blood. (XLSX) [file pone.0176739.s002.xlsx]

## Sheet: Sheet1
	S3 Table. Survival of L. rhamnosus strains in blood.
Methods:	Blood Survival Assay
	Survival of the strains in blood was tested using pour plate method described in detail [24] (Haapasalo et al 2012 J Immunology).
	Bacteria was cultered in hirudin anticoagulated blood at 37C for 0, 120min and 180min.
	The bacteria (400CFU/ml) were plated 50 µl/plate as dublicates and cultured on MRS plates (Lactobacillus) or in blood plates (GAS) o/n +37C.
	The colonies were counted and survival calculated. See details [24]
Reference:	24. Haapasalo K, Vuopio J, Syrjanen J, Suvilehto J, Massinen S, Karppelin M, et al. Acquisition of complement factor H is important for pathogenesis of streptococcus pyogenes infections: Evidence from bacterial in vitro survival and human genetic association. J Immunol. 2012 Jan 1;188(1):426-35.
Results:
	Experiment 1					Experiment 1					Experiment 1
	Growth time (minutes)	st369, pathogenic GAS		Average		Growth time (minutes)	st369, pathogenic GAS		Average		Growth time (minutes)	st369, pathogenic GAS		Average
		CFU/ml					Survival (%)					Multiplying factor
	0	2560	2980	2770		0	92.4188	107.581	100		0	0.924188	1.07581	1
	120	99000	83400	91200		120	3574.01	3010.83	3292.42		120	35.7401	30.1083	32.9242
	180	314000	378000	346000		180	11335.7	13646.2	12491		180	113.357	136.462	124.91
	Growth time (minutes)	L. Rhamnosus GG		Average		Growth time (minutes)	L. Rhamnosus GG		Average		Growth time (minutes)	L. Rhamnosus GG		Average
		CFU/ml					Survival (%)					Multiplying factor
	0	4840	5180	5010		0	96.6068	103.393	100		0	0.966068	1.03393	1
	120	0	200	100		120	0	3.99202	1.99601		120	0	0.0399202	0.0199601
	180	0	0	0		180	0	0	0		180	0	0	0
	Growth time (minutes)	Clinical blood isolate		Average		Growth time (minutes)	Clinical blood isolate		Average		Growth time (minutes)	Clinical blood isolate		Average
		CFU/ml					Survival (%)					Multiplying factor
	0	800	980	890		0	89.8876	110.112	100		0	0.898876	1.10112	1
	120	200	200	200		120	22.4719	22.4719	22.4719		120	0.224719	0.224719	0.224719
	180	100	20	60		180	11.236	2.24719	6.74157		180	0.11236	0.0224719	0.0674157
	Experiment 2					Experiment 2					Experiment 2
	Growth time (minutes)	st369		Average		Growth time (minutes)	st369		Average		Growth time (minutes)	st369		Average
		CFU/ml					Survival (%)					Multiplying factor
	0	1960	1880	1920		0	102.083	97.9167	100		0	1.02083	0.979167	1
	120	139600	155200	147400		120	7270.83	8083.33	7677.08		120	72.7083	80.8333	76.7708
	180	1102000	820000	961000		180	57395.8	42708.3	50052.1		180	573.958	427.083	500.521
	Growth time (minutes)	L. Rhamnosus GG		Average		Growth time (minutes)	L. Rhamnosus GG		Average		Growth time (minutes)	L. Rhamnosus GG		Average
		CFU/ml					Survival (%)					Multiplying factor
	0	9930	7500	8715		0	113.941	86.0585	100		0	1.13941	0.860585	1
	120	3960	4200	4080		120	45.4389	48.1928	46.8158		120	0.454389	0.481928	0.468158
	180	3540	3740	3640		180	40.6196	42.9145	41.7671		180	0.406196	0.429145	0.417671
	Growth time (minutes)	Clinical blood isolate		Average		Growth time (minutes)	Clinical blood isolate		Average		Growth time (minutes)	Clinical blood isolate		Average
		CFU/ml					Survival (%)					Multiplying factor
	0	5240	10200	7720		0	67.8756	132.124	100		0	0.678756	1.32124	1
	120	3220	4500	3860		120	41.7098	58.2902	50		120	0.417098	0.582902	0.5
	180	2800	2440	2620		180	36.2694	31.6062	33.9378		180	0.362694	0.316062	0.339378
	Combined data, CFU/ml								Combined data, Survival (%)								Combined data, Multiplyfication factor
	Growth time (minutes)	st369, experiment 1		st369, experiment 2		Average	STD		Growth time (minutes)	st369, experiment 1		st369, experiment 2		Average	STD		Growth time (minutes)	st369, experiment 1		st369, experiment 2		Average	STD
		CFU/ml		CFU/ml						Survival (%)		Survival (%)						Multiplying factor		Multiplying factor
	0	2560	2980	1960	1880	2345	520.865		0	109.168	127.079	83.5821	80.1706	100	22.2117		0	1.09168	1.27079	0.835821	0.801706	1	0.222117
	120	99000	83400	139600	155200	119300	33673.9		120	4221.75	3556.5	5953.09	6618.34	5087.42	1435.99		120	42.2175	35.565	59.5309	66.1834	50.8742	14.3599
	180	314000	378000	1102000	820000	653500	374181		180	13390.2	16119.4	46993.6	34968	14754.8	15956.6		180	133.902	161.194	469.936	349.68	147.548	159.566
	Growth time (minutes)	L. Rhamnosus GG, exp. 1		L. Rhamnosus GG, exp. 2		Average	STD		Growth time (minutes)	L. Rhamnosus GG, exp. 1		L. Rhamnosus GG, exp. 2		Average	STD		Growth time (minutes)	L. Rhamnosus GG, exp. 1		L. Rhamnosus GG, exp. 2		Average	STD
		CFU/ml		CFU/ml						Survival (%)		Survival (%)						Multiplying factor		Multiplying factor
	0	4840	5180	9930	7500	6862.5	2362.01		0	70.5282	75.4827	144.699	109.29	100	34.4191		0	0.705282	0.754827	1.44699	1.0929	1	0.344191
	120	0	200	3960	4200	2090	2301.39		120	0	2.91439	57.7049	61.2022	30.4554	33.5358		120	0	0.0291439	0.577049	0.612022	0.304554	0.335358
	180	0	0	3540	3740	1820	2103.14		180	0	0	51.5847	54.4991	26.5209	30.6469		180	0	0	0.515847	0.544991	0.265209	0.306469
	Growth time (minutes)	Clinical blood isolate, exp. 1		Clinical blood isolate, exp. 2		Average	STD		Growth time (minutes)	Clinical blood isolate, exp. 1		Clinical blood isolate, exp. 2		Average	STD		Growth time (minutes)	Clinical blood isolate, exp. 1		Clinical blood isolate, exp. 2		Average	STD
		CFU/ml		CFU/ml						Survival (%)		Survival (%)						Multiplying factor		Multiplying factor
	0	800	980	5240	10200	4305	4433.43		0	18.583	22.7642	121.719	236.934	100	102.983		0	0.18583	0.227642	1.21719	2.36934	1	1.02983
	120	200	200	3220	4500	2030	2176.76		120	4.64576	4.64576	74.7967	104.53	47.1545	50.5634		120	0.0464576	0.0464576	0.747967	1.0453	0.471545	0.505634
	180	100	20	2800	2440	1340	1485.66		180	2.32288	0.464576	65.0407	56.6783	31.1266	34.5102		180	0.0232288	0.00464576	0.650407	0.566783	0.311266	0.345102
Figures:
Conclusions:		L. rhamnosus GG and clinical isolate showed only little survival in blood compared to st369 a pathogenic group A streptococcus.
