# Supplementary material for: Genotypic and phenotypic diversity of Lactobacillus rhamnosus clinical isolates, their comparison with strain GG and their recognition by complement system
Source: PLoS One. 2017 May 11;12(5):e0176739. doi: 10.1371/journal.pone.0176739 (PMC5426626; doi:10.1371/journal.pone.0176739)
Supplement: S3 Table — The data consist of complement C3a and TCC formation after stimulation with the strains, the binding of complement inhibitors factor H and C4bp and determination of platelet aggregation and biofilm formation. (XLSX) [file pone.0176739.s003.xlsx]

## Sheet: S3T_COMPLEMENT_ACTIVATION_C3a
Formation of complement C3a:
C3a formation in serum after complement activation by L. Rhamnosus strains.				Experiment 1		Experiment 2		Experiment 3		Experiment 4		Experiment 5		Experiment 6
Complement C3a measured from activated serum by ELISA (see methods).			Serum activation experiment:	Biological replicate 1	Biological replicate 2	Biological replicate 1	Biological replicate 2	Biological replicate 1	Biological replicate 2	Biological replicate 1	Biological replicate 2	Biological replicate 1	Biological replicate 2	Biological replicate 1	Biological replicate 2
			C3a measurement by ELISA:	C3a ELISA	C3a ELISA	C3a ELISA	C3a ELISA	C3a ELISA	C3a ELISA	C3a ELISA	C3a ELISA	C3a ELISA	C3a ELISA	C3a ELISA	C3a ELISA
			Strain name	(mg/ml)	(mg/ml)	(mg/ml)	(mg/ml)	(mg/ml)	(mg/ml)	(mg/ml)	(mg/ml)	(mg/ml)	(mg/ml)	(mg/ml)	(mg/ml)	Average	SD	n
			L. rhamnosus GG (ATCC 53103)	15.1156	15.1156	17.3262	16.2143	17.8151	17.563			17.6885	17.6885	17.9886	18.2018	17.0717	1.16072	10
			Lrh7					16.8487	18.2773							17.563	1.01015	2
			Lrh8					14.3277	13.1933	24.3998	23.4832	20.6712	19.4544			19.2549	4.63497	6
			Lrh9					15.7983	16.4706	22.5229	20.2095					18.7503	3.17664	4
			Lrh11					20.2941	21.5546							20.9244	0.891311	2
			Lrh13					12.9412	12.1008							12.521	0.594207	2
			Lrh14					15.3361	13.4034			19.766	18.6234			16.7822	2.93261	4
			Lrh18					18.4454	17.3109							17.8782	0.80218	2
			Lrh20					18.0252	18.6975							18.3613	0.475366	2
			Lrh22					17.1429	15.8403							16.4916	0.921021	2
			Lrh28					16.8487	15.4202	24.3125	24.3125					20.2235	4.7575	4
			Lrh30					17.0168	15.6303							16.3235	0.980442	2
			Lrh32					19.8739	20.8403							20.3571	0.683338	2
			Lrh38					18.2773	18.9076							18.5924	0.445656	2
			Lrh39					21.0504	20.2521			20.0776	19.7957			20.294	0.538231	4
			Lrh46					19.6639	20.3361	24.1379	21.9118					21.5124	1.98777	4
			Lrh47					20.3782	20.8824	20.5151	21.519	22.3184	22.6003			21.3689	0.936773	6
			PB12 (C11), L. rhamnosus GG without SpaCBA pili	16.5537	15.2115	16.2143	22.3442	17.1849	17.3109							17.4699	2.50526	6
			L. salivarius CCUG 47825											17.5622	18.1308	17.8465	0.402051	2
		Positive control:	emm8 (S. pyogenes, Rfs ATCC 12349)	15.9145	20.3565	17.2122	18.9228	21.8487	21.1345	22.3047	22.392	19.484	20.6267			20.0197	2.16393	10
		Negative control:	st369 (S. pyogenes, blood isolate, Escape complement)	0.123822	0.0972891	0.116061	0.0422039	0.181653	0	0.470413	3.98442	0.0148393				0.558967	1.2922	9

## Sheet: S3T_COMPLEMENT_ACTIVATION_TCC
Formation of terminal complement complex (TCC):
TCC formation in serum after complement activation by L. Rhamnosus strains.
Complement TCC (SC5b-9) measured from serum by ELISA (see methods).
				Experiment 1				Experiment 2				Experiment 3				Experiment 4				Experiment 5		Experiment 6				Experiment 7
			Serum activation experiment:	Biological replicate 1		Biological replicate 2		Biological replicate 1		Biological replicate 2		Biological replicate 1		Biological replicate 2		Biological replicate 1		Biological replicate 2		Biological replicate 1		Biological replicate 1		Biological replicate 2		Biological replicate 1
			TCC measurement by ELISA:	TCC ELISA (AU/ml)		TCC ELISA (AU/ml)		TCC ELISA (AU/ml)		TCC ELISA (AU/ml)		TCC ELISA (AU/ml)		TCC ELISA (AU/ml)		TCC ELISA (AU/ml)		TCC ELISA (AU/ml)		TCC ELISA (AU/ml)		TCC ELISA (AU/ml)		TCC ELISA (AU/ml)		TCC ELISA (AU/ml)		Average	SD	n
			Strain name	Replicate 1	Replicate 2	Replicate 1	Replicate 2	Replicate 1	Replicate 2	Replicate 1	Replicate 2	Replicate 1	Replicate 2	Replicate 1	Replicate 2	Replicate 1	Replicate 2	Replicate 1	Replicate 2	Replicate 1	Replicate 2	Replicate 1	Replicate 2	Replicate 1	Replicate 2	Replicate 1	Replicate 2
			L. rhamnosus GG (ATCC 53103)	407.165	404.543	408.038	381.826	381.406	393.489	547.877	555.261									208.264	273.526	370.364	367.404	244.936	247.526	447.289	421.073	378.749	98.0735	16
			Lrh7	542.057	456.343	508.914	528.343	484.108	522.37	500.543	547.359																	511.255	30.5668	8
			Lrh8	314.548	276.977	275.229	225.426	360.597	342.474	380.735	382.078					401.917	432	371.984	397.82	643.475	416.99							373.018	98.1475	14
			Lrh9	373.962	339.886	436.872	345.129	424.367	417.654	467.998	485.451					324.561	355.22	334.987	322.031									385.676	58.0228	12
			Lrh11	401.922	390.564	341.634	357.361	623.058	579.426	690.854	612.989																	499.726	140.237	8
			Lrh13	556.914	610.629	508.914	494.057	553.772	530.043	512.728	526.837																	536.737	36.7855	8
			Lrh14	124.945	94.3644	55.0459	110.965	455.915	369.995	437.695	364.585					214.58	178.873	233.078	202.155	510.308	554.435							279.067	166.377	14
			Lrh18	423.766	285.714	476.19	535.605	649.908	585.467	725.088	689.512																	546.406	147.693	8
			Lrh20	503.2	524.914	456.343	782.057	522.37	578.755	561.468	610.848																	567.494	98.8633	8
			Lrh22	416.343	391.2	415.2	441.486	500.543	526.195	504.391	490.923																	460.785	50.62	8
			Lrh28	238.532	225.426	219.31	226.3	601.577	569.357	578.142	503.75																	395.299	181.661	8
			Lrh30	527.741	505.024	394.932	383.574	682.799	643.866	588.152	558.617																	535.588	107.289	8
			Lrh32	297.947	254.26	262.997	251.638	470.683	465.313	531.096	516.999																	381.367	125.24	8
			Lrh38	359.109	193.971	324.159	289.209	488.807	500.218	508.273	507.602																	396.419	121.465	8
			Lrh39	383.574	397.554	350.371	269.987	543.85	492.834	431.75	437.12									565.555	493.887							436.648	90.757	10
			Lrh46	336.391	271.734	358.235	290.957	525.055	525.726	507.602	510.287					282.519	291.319	311.107	312.619									376.963	106.217	12
			Lrh47	321.538	253.386	447.357	129.314	586.139	593.522	686.827	670.717					440.259	491.443	433.869	481.04	485.876	543.534							468.916	154.423	14
			PB12 (C11), L. rhamnosus GG without SpaCBA pili	435.998	304.937	522.499	482.307	503.574	493.506	544.521	506.259											406.253	392.193	356.674	349.274			441.5	78.4193	12
		Positive control:	emm8 (S. pyogenes, Rfs ATCC 12349)	598.515	477.064	450.852	396.68	594.865	619.701	573.385	578.084	421.662	348.552	456.934	404.988	758.44	709.399			582.654	603.082	350.014	354.824	465.082	471.372			510.807	119.088	20
		Low complement control:	st369 (S. pyogenes, blood isolate, Escape complement)	214.067	292.704	298.82	271.734	384.763	369.324	381.406	393.489	283.78	288.269	344.705	372.922	69.6208		66.2575		173.969	1.84983	193.137	195.727	175.007	191.287			248.142	115.108	20

## Sheet: S3T_COMPLEMENT_INHIBITION_FH
Complement inhibitor factor H binding:
Binding of I-125 labeleb factorH to the strains.				Experiment 1			Experiment 2			Experiment 3			Experiment 4
			Strain name	FH Binding (%)			FH Binding (%)			FH Binding (%)			FH Binding (%)			Average	SD	n
				Replicate 1	Replicate 2	Replicate 3	Replicate 1	Replicate 2	Replicate 3	Replicate 1	Replicate 2	Replicate 3	Replicate 1	Replicate 2	Replicate 3
			L. rhamnosus GG (ATCC 53103)	0.323115	1.24235	0.19058					0.676053	0.294032		0.80809	0.329393	0.551944	0.377859	7
			Lrh7										0.498975	0.3185	0.35183	0.389768	0.0960326	3
			Lrh8				1,65*	0.551451	0.511718	0.297032	0.332215	0.542475				0.446978	0.122352	5
			Lrh9							0.28867	0.365439	0.352248				0.335453	0.041048	3
			Lrh11				0.459707	0.557427	0.645711	0.270259	0.330882	0.444691				0.451446	0.138888	6
			Lrh13										0.410788	0.374005	0.441258	0.408684	0.0336761	3
			Lrh14				0.535854	0.935936	0.394733				0.281939	0.489783	0.368695	0.501157	0.231212	6
			Lrh18							0.775111	0.436264	0.380096				0.53049	0.213701	3
			Lrh20										0.299963	0.385156	1,80*	0.34256	0.0602402	2
			Lrh22										0.459924	0.373089	0.497671	0.443561	0.0638826	3
			Lrh28							0.473646	0.374244	0.536626				0.461505	0.0818694	3
			Lrh30										0.432249	0.55769	0.345715	0.445218	0.106581	3
			Lrh32							0.447887	0.338393	0.381166				0.389149	0.0551817	3
			Lrh38							0.229896	0.375073	0.295296				0.300088	0.0727066	3
			Lrh39							0.232191	0.367253	0.31918				0.306208	0.0684591	3
			Lrh40							0.480757	0.344402	0.483262				0.43614	0.0794573	3
			Lrh46							0.472123	0.42811	0.237136				0.379123	0.124918	3
			Lrh47				0.490977	1.03973	0.774217	0.353798	0.356237	0.314751				0.554951	0.291488	6
			PB12 (C11), L. rhamnosus GG without SpaCBA pili	0.209459	0.0705253	0.179516				0.38959	0.281649	0.492636				0.270563	0.152082	6
		Negative control:	emm8 (S. pyogenes, Rfs ATCC 12349)	1.3364	0.916393	1.41207	0.792475	1.42949	1.80859	0.595506	0.716064	0.478949				1.05399	0.455631	9
		Positive control:	st369 (S. pyogenes, blood isolate, Escape complement)	44.4005	34.018	31.7387	36.355	35.5656	34.5704	45.8617	71.0159	73.4948	55.5721	50.643	47.1872	46.7019	14.0535	12
		Background:	GVB, background control	0.199558	0.105419	0.261767	0.443658	0.397092	0.592217	0.307425	0.407768	0.542475	0.336372	0.244786	0.497671	0.361351	0.14573	12
							*outlier								*outlier

## Sheet: S3T_COMPLEMENT_INHIBITION_C4bp
Complement inhibitor C4bp binding:
Binding of I-125 labeleb C4bp to the strains.					Experiment 1			Experiment 2			Experiment 3
				Strain name	C4bp Binding (%)			C4bp Binding (%)			C4bp Binding (%)			Average	SD	n
					Replicate 1	Replicate 2	Replicate 3	Replicate 1	Replicate 2	Replicate 3	Replicate 1	Replicate 2	Replicate 3
				L. rhamnosus GG (ATCC 53103)				1.46918	1.85695	1.66619	3.5939	2.5194	2.21376	2.2199	0.771947	6
				Lrh7							3.50727	2.25681	2.38171	2.71527	0.688734	3
				Lrh8	4.22471	3.78397	3.73107	3.28965	3.59388	2.60356				3.53781	0.549058	6
				Lrh9				4.30911	3.84229	4.68754				4.27965	0.423391	3
				Lrh11	2.05249	1.82133	1.95901	2.55248	2.20757	2.68599				2.21315	0.341373	6
				Lrh13							4.03717	1.85627	8.12569	4.67304	3.18271	3
				Lrh14	1.59362	1.46205	1.39658				2.45464	2.45084	6.26341	2.60352	1.85579	6
				Lrh18				3.03863	2.47055	2.4882				2.66579	0.323005	3
				Lrh20							3.70928	2.03198	1.66885	2.47004	1.08846	3
				Lrh22							9.23263		8.12569	8.67916	0.782727	2
				Lrh28				2.50511	2.7112	2.37073				2.52901	0.171489	3
				Lrh30							10.8009	2.93609	2.52078	5.41927	4.66528	3
				Lrh32				4.6093	3.32102	2.86282				3.59771	0.90552	3
				Lrh38				2.89494	3.29242	2.60356				2.93031	0.34579	3
				Lrh39				2.18185	2.01427	0.330064				1.50873	1.02418	3
				Lrh40				2.8344	2.66062	2.90742				2.80081	0.126781	3
				Lrh46				1.87315	1.90321	1.78576				1.85404	0.0610163	3
				Lrh47	1.55663	1.32364	1.29849	2.13692	1.76209	1.73252				1.63505	0.314298	6
				PB12 (C11), L. rhamnosus GG without SpaCBA pili					2.14195	2.06975				2.10585	0.051051	2
			Positive control:	emm8 (S. pyogenes, ATCC 12349)	35.9693	35.6631	35.5399							35.7241	0.221119	3
			Positive control:	st369 (S. pyogenes, blood isolate, escape complement)	45.1693	46.5344	48.3764	29.8483	31.308	31.2765	11.4681		11.3672	31.9185	14.6664	8
			Background:	GVB, background control	0.690006	0.799358	4.42388	1.79996	1.584	1.40331	2.33317	2.85232	7.76493	2.62788	2.23958	9

## Sheet: S3T_BIOFILM_FORMATION
Biofilm formation:
				Experiment 1				Experiment 2				Experiment 3
The strains were grown on plated.			Strain	Biofilm formation (%)				Biofilm formation (%)				Biofilm formation (%)				Average	SD	n
The cells were stained and washed.				Replicate 1	Replicate 2	Replicate 3	Replicate 4	Replicate 1	Replicate 2	Replicate 3	Replicate 4	Replicate 1	Replicate 2	Replicate 3	Replicate 4
The plate was scanned at 700nm			L. rhamnosus GG (ATCC 53103)	4.8561	6.439	6.03603	5.84414	2.8964	3.06789	2.89267	2.86861	2.44054	2.74433	2.72297	2.52598	3.77789	1.53862	12
and each well was compared to average intensities of			Lrh7	7.32824	7.75203	7.12777	6.34673	3.0767	2.9147	2.80557	2.7222	2.9142	3.06542	2.80977	2.72297	4.29886	2.12267	12
positive control (L. salivarius 100%) to get relative value (%).			Lrh8	4.03831	4.62623	4.47966	4.16039	3.39461	3.48408	3.19871	3.23633	2.67178	2.85487	2.59176	2.38086	3.42647	0.753194	12
See details (Materials and methods).			Lrh9	4.32492	4.27185	3.94195	3.25931	3.30852	3.21668	3.28073	2.62899	2.49072	2.48834	2.41341	1.98179	3.13394	0.76115	12
			Lrh11	5.7143	6.06338	5.29132	5.25172	5.22443	5.85821	5.40236	5.05633	3.50993	3.69742	3.78795	3.36786	4.8521	0.978342	12
			Lrh13	16.4513	19.0096	13.2054	11.4074	5.94294	5.56471	5.0099	4.0999	6.14915	8.97316	6.37835	4.66238	8.90451	4.99072	12
			Lrh14	5.86904	5.94866	5.14026	4.31676	2.92487	3.24413	3.02214	2.83065	2.31644	2.58599	2.7701	2.4341	3.61693	1.34095	12
			Lrh18	6.59497	5.78861	7.46052	8.2779	4.16938	4.69979	4.79434	5.98734	2.99998	3.16239	3.32005	2.85385	5.00909	1.82323	12
			Lrh20	6.83748	6.21118	6.59333	6.82197	2.78998	2.97638	3.13263	2.84556	2.65279	2.66194	2.5965	2.62363	4.06195	1.89857	12
			Lrh22	5.69266	5.60937	4.92591	4.35391	2.85336	2.63374	2.59307	2.44564	2.56836	2.58226	2.3751	2.22761	3.40508	1.33515	12
			Lrh28	26.5999	16.9943	15.7984	21.4548	18.9259	15.5049	10.6037	9.25689	5.34152	5.69448	5.27642	5.54563	13.0831	7.18921	12
			Lrh30	7.86105	5.88088	6.34469	5.30398	11.6978	12.0672	9.00812	8.12151	3.41635	5.90774	6.38751	3.47941	7.12302	2.77913	12
			Lrh32	8.47143	7.78143	6.22098	6.57455	6.52622	5.58131	4.96414	4.00568	4.41182	3.78999	3.06034	2.92709	5.35958	1.80233	12
			Lrh38	4.22693	4.48538	4.63236	4.3286	3.58644	3.40749	3.35326	3.18956	2.95218	2.96811	2.72975	2.49174	3.52932	0.725178	12
			Lrh39	6.23813	6.7693	6.16464	6.00867	4.11515	4.78485	3.99314	4.21242	3.17426	3.04542	2.96167	2.87318	4.5284	1.43538	12
			Lrh46	6.30182	6.85014	6.52433	6.05644	4.65539	4.84823	4.35477	4.02737	3.05525	3.1963	2.94167	2.9142	4.64383	1.48207	12
			Lrh47	6.10135	5.7045	4.99818	4.32043	4.63946	4.60116	4.04466	3.7742	3.15832	3.08136	2.79553	2.59006	4.15077	1.1266	12
			PB12 (C11), L. rhamnosus GG without SpaCBA pili	4.26531	6.55577	6.33244	5.35093	2.59137	2.88352	2.86047	2.94419	2.77112	3.04067	2.88131	2.94167	3.7849	1.46965	12
			L. salivarius CCUG 47825	47.3863	145.769	113.835	93.0105		95.9787	120.522	83.4997		95.2345	95.0355	109.73	100	25.7225	10

## Sheet: S2T_PLATELET_AGGREGATION
	Donor 1		Donor 2		Donor 3		Donor 4		Donor 5		Donor 6		Platelet aggregation		Lag time for the aggregation (positives)		Total aggregation count
Strain	Aggregation (%)	Lag time (min)	Aggregation (%)	Lag time (min)	Aggregation (%)	Lag time (min)	Aggregation (%)	Lag time (min)	Aggregation (%)	Lag time (min)	Aggregation (%)	Lag time (min)	Average Light transmission %	SD of Light transmission %	Average Light transmission %	SD of time (min)	Positive/All Assays
L.salivarius CCUG 47825	28	15	0	0							54	11	27.3333	27.0062	13	19.3276	2/3
L. rhamnosus GG (ATCC 53103)	0	0	0	0					0	0	0	0	0	0	0	0	0/4
Lrh7	0	0	0	0									0	0	0	0	0/2
Lrh8	0	0			0	0							0	0	0	0	0/2
Lrh9	0	0			0	0							0	0	0	0	0/2
Lrh11	0	0	55	12.5			0	0	0	0	0	0	11	24.5967	12.5	5.59017	1/5
Lrh13	0	0	0	0									0	0	0	0	0/2
Lrh14	0	0			0	0							0	0	0	0	0/2
Lrh18	68	13	0	0			74	12	0	0	0	0	28.4	38.9461	12.5	6.85565	2/5
Lrh20	0	0	0	0									0	0	0	0	0/2
Lrh22	50	7.5	50	11					45	9	53	11	49.5	3.31662	9.625	1.70171	4/4
Lrh28	85	5	65	14					49	15	77	12	69	15.6631	11.5	4.50925	4/4
Lrh30	0	0	0	0	0	0							0	0	0	0	0/3
Lrh32	0	0			0	0							0	0	0	0	0/2
Lrh38	0	0			0	0							0	0	0	0	0/2
Lrh39	0	0			0	0							0	0	0	0	0/2
Lrh46	0	0			0	0							0	0	0	0	0/2
Lrh47	0	0			0	0							0	0	0	0	0/2
